# Supplementary material
Source: PubMed Central journal article supplement (PMC7162965)
Supplement: 41386_2020_631_MOESM3_ESM.pdf [file 41386_2020_631_MOESM3_ESM.pdf]

| Experiment                                       | Measurement                                                    | Statistical Test | Comparison          | ° of freedom, error | F or T         | p            | *   | Group Size                                                 | Fig.  | Notes                                                                      |
|--------------------------------------------------|----------------------------------------------------------------|------------------|---------------------|---------------------|----------------|--------------|-----|------------------------------------------------------------|-------|----------------------------------------------------------------------------|
| Social buffering of learned fear                 | Percent freezing                                               | <i>t</i> -test   | Single vs Paired    | 24.000              | 3.322          | 0.003        | **  | n = 13/grp                                                 | 1b    |                                                                            |
| Social buffering of learned fear by sex          | Percent freezing                                               | ANOVA            | Sex                 | 1, 22               | 8.737          | 0.007        | **  | M n = 7 single, n = 8 paired. F n = 6 single, n = 5 paired | S1a,b | Fisher's LD: M single vs M paired p = 0.001; F single vs F paired p = 0.08 |
|                                                  |                                                                |                  | Sex x Condition     | 1, 22               | 1.154          | 0.294        |     |                                                            |       |                                                                            |
|                                                  |                                                                |                  | Single/pair         | 1, 22               | 14.76          | <0.001       | *** |                                                            |       |                                                                            |
| Social buffering of innate fear                  | Percent freezing                                               | <i>t</i> -test   | Single vs Paired    | 24.000              | 3.081          | 0.005        | **  | n = 13/grp                                                 | 1c    |                                                                            |
| Social buffering of innate fear by sex           | Percent freezing                                               | ANOVA            | Sex                 | 1, 22               | 0.452          | 0.508        |     | M n = 7 single, n = 8 paired. F n = 6 single, n = 5 paired | S1c,d | Fisher's LD: M single vs M paired p = 0.05; F single vs F paired p = 0.04  |
|                                                  |                                                                |                  | Sex x Condition     | 1, 22               | 0.084          | 0.775        |     |                                                            |       |                                                                            |
|                                                  |                                                                |                  | Single/pair         | 1, 22               | 8.606          | 0.008        | **  |                                                            |       |                                                                            |
| Social buffering of innate fear                  | Locmotion (Grid crossings; 1st 5 min)                          | <i>t</i> -test   | Single vs Paired    | 24.000              | 1.73           | 0.096        |     | n = 13/grp                                                 | 1d    |                                                                            |
| Social buffering of innate fear by sex           | Locmotion (Grid crossings; 1st 5 min)                          | ANOVA            | Sex                 | 1, 24               | 1.568          | 0.244        |     | n = 5 F, 8 M paired; 6F 7M single                          | S1e,f |                                                                            |
|                                                  |                                                                |                  | Sex x Condition     | 1, 24               | 0.007          | 0.936        |     |                                                            |       |                                                                            |
|                                                  |                                                                |                  | Single/pair         | 1, 24               | 3.142          | 0.090        |     |                                                            |       |                                                                            |
| Social buffering of innate fear                  | percent freezing relative to duration social interaction (sec) | Correlation      | pearson; spearman   |                     | -0.061; -0.088 | 0.843; 0.775 |     | n = 13/grp                                                 | 1e    |                                                                            |
| Object-mediated buffering of learned fear        | Percent freezing                                               | <i>t</i> -test   | Object vs No object | 1, 18               | 3.629          | 0.002        | **  | n = 10/grp                                                 | 1g    |                                                                            |
| Object-mediated buffering of learned fear by sex | Percent freezing                                               | ANOVA            | Sex                 | 1, 16               | 0.008          | 0.930        |     | M n = 3/grp, F n = 7/grp                                   | S1g,h |                                                                            |
|                                                  |                                                                |                  | Sex x Object        | 1, 16               | 0.034          | 0.857        |     |                                                            |       |                                                                            |
|                                                  |                                                                |                  | Object              | 1, 16               | 10.327         | 0.005        | **  |                                                            |       |                                                                            |
| Object-mediated buffering of innate fear         | Percent freezing                                               | <i>t</i> -test   | object vs no object | 18.000              | 0.8            | 0.434        |     | n = 10/grp                                                 | 1h    |                                                                            |
| Object-mediated buffering of innate fear by sex  | Percent freezing                                               | ANOVA            | Sex                 | 1, 16               | 5.892          | 0.027        | *   | M n = 3/grp, F n = 7/grp                                   | S1i,j |                                                                            |
|                                                  |                                                                |                  | sex x object        | 1, 16               | 0.127          | 0.726        |     |                                                            |       |                                                                            |
|                                                  |                                                                |                  | Object              | 1, 16               | 0.447          | 0.513        |     |                                                            |       |                                                                            |
| Object-mediated buffering of innate fear         | Distance traveled (cm)                                         | <i>t</i> -test   | Object vs No object | 17.000              | 0.9977         | 0.332        |     | n = 9 object, 10 no object                                 | 1i    | 1367 excluded due to tracking errors                                       |
| Object-mediated buffering of innate fear by sex  | Distance traveled (cm)                                         | ANOVA            | Sex                 | 1, 17               | 0.591          | 0.454        |     | n = 7 F, 3 M object; 6F 3M no object                       | S1k,l | 1367 excluded due to tracking errors                                       |
|                                                  |                                                                |                  | Sex x Condition     | 1, 17               | 0.501          | 0.490        |     |                                                            |       |                                                                            |
|                                                  |                                                                |                  | Single/Pair         | 1, 17               | 0.785          | 0.389        |     |                                                            |       |                                                                            |
| Object-mediated buffering of innate fear         | Time in object zone (sec)                                      | <i>t</i> -test   | Object vs No object | 17.000              | -3.256         | 0.005        | **  | n = 10 object, 10 no object                                | 1j    | 1399 excluded as an outlier                                                |

|                                                   |                           |                                                       |                                  |        |        |        |    |                          |     |                                                                                                       |
|---------------------------------------------------|---------------------------|-------------------------------------------------------|----------------------------------|--------|--------|--------|----|--------------------------|-----|-------------------------------------------------------------------------------------------------------|
| Social buffering of cued fear                     | Percent freezing          | RM-ANOVA                                              | Pre/post scent (RM)              | 1, 19  | 9.9373 | 0.005  | ** | n = 11 single, 10 paired | 1l  |                                                                                                       |
|                                                   |                           |                                                       | Scent x Condition                | 1, 19  | 0.0966 | 0.759  |    |                          |     |                                                                                                       |
|                                                   |                           |                                                       | Single/Pair                      | 1, 19  | 6.621  | 0.019  | *  |                          |     |                                                                                                       |
| Social interaction following cued fear            | Time interacting          | paired <i>t</i> -test                                 | Pre vs Post-scent                | 9.000  | 2.202  | 0.055  | #  | n = 10                   | 1m  |                                                                                                       |
| Social buffering of cued fear - Males             | Percent freezing          | RM-ANOVA                                              | Pre/Post scent (RM)              | 1, 12  | 10.1   | 0.008  | ** | n = 7/grp                | S1m |                                                                                                       |
|                                                   |                           |                                                       | Scent x Condition                | 1, 12  | 0.876  | 0.368  |    |                          |     |                                                                                                       |
|                                                   |                           |                                                       | Single/Pair                      | 1, 12  | 9.163  | 0.011  | *  |                          |     |                                                                                                       |
| Social buffering of cued fear - Females           | Percent freezing          | RM-ANOVA                                              | Pre/Post scent (RM)              | 1, 5   | 1.261  | 0.312  |    | n = 4 single, 3 paired   | S1n |                                                                                                       |
|                                                   |                           |                                                       | Scent x Condition                | 1, 5   | 0.6218 | 0.466  |    |                          |     |                                                                                                       |
|                                                   |                           |                                                       | Single/Pair                      | 1, 5   | 0.348  | 0.583  |    |                          |     |                                                                                                       |
| Cfos+ cell counts                                 | Number of fos+ cells      | ANOVA                                                 | Group                            | 2, 10  | 7.583  | 0.010  | ** | n = 3 - 6/grp            | 2b  |                                                                                                       |
|                                                   |                           | Post-hoc <i>t</i> -test with uncorrected Fisher's LSD | Ctrl vs Novel                    | 10.000 | 2.533  | 0.030  | *  |                          |     |                                                                                                       |
|                                                   |                           |                                                       | Ctrl vs Familiar                 | 10.000 | 3.891  | 0.003  | ** |                          |     |                                                                                                       |
|                                                   |                           |                                                       | Novel vs Familiar                | 10.000 | 1.829  | 0.097  |    |                          |     |                                                                                                       |
| Fluorescence of eYFP                              | Fluorescence (norm. a.u.) | ANOVA                                                 | Group                            | 2, 21  | 3.392  | 0.012  | *  | n = 8 / group            | 2f  |                                                                                                       |
|                                                   |                           | Post-hoc <i>t</i> -test with uncorrected Fisher's LSD | Ctrl vs Object                   | 21.000 | 0.6906 | 0.4974 |    |                          |     |                                                                                                       |
|                                                   |                           |                                                       | Ctrl vs Partner                  | 21.000 | 2.464  | 0.0224 | *  |                          |     |                                                                                                       |
|                                                   |                           |                                                       | Object vs Partner                | 21.000 | 3.155  | 0.0048 | ** |                          |     |                                                                                                       |
| Optogenetic modulation of freezing - learned fear | Percent freezing          | RM-ANOVA                                              | Light On/Off (RM)                | 1, 46  | 51.439 | <0.001 | ** | n = 26 ctrl, 22 expt     | 3c  | Excluded due to technical reasons: 9305, 9796, 9795, 9562, 9522, 9524; Excluded 9811 = freezing < 10% |
|                                                   |                           |                                                       | Light x Group                    | 1, 46  | 4.643  | 0.036  | *  |                          |     |                                                                                                       |
|                                                   |                           |                                                       | Group                            | 1, 46  | 1.082  | 0.304  |    |                          |     |                                                                                                       |
|                                                   | Change in freezing        | <i>t</i> -test: ctrl vs exp                           | Light off minus light on         | 46.000 | -2.111 | 0.040  | *  |                          |     |                                                                                                       |
| Optogenetic modulation of freezing - innate fear  | Percent freezing          | RM-ANOVA                                              | Light On/Off (RM)                | 2, 96  | 2.068  | 0.132  |    | n = 28 ctrl, 22 exp      | 3d  | sphericity met; Excluded due to technical reasons: 9796, 9562, 9522, 9524, 9525                       |
|                                                   |                           |                                                       | Light x Group                    | 2, 96  | 4.832  | 0.010  | *  |                          |     |                                                                                                       |
|                                                   |                           |                                                       | Group                            | 1, 48  | 1.653  | 0.205  |    |                          |     |                                                                                                       |
|                                                   |                           | <i>t</i> -test                                        | Group diff during light ON epoch | 48.000 | 2.706  | 0.009  | ** |                          |     |                                                                                                       |
|                                                   |                           |                                                       | Controls                         | 27.000 | -0.472 | 0.640  |    |                          |     |                                                                                                       |
| Response to light application                     |                           |                                                       |                                  |        |        |        |    |                          |     |                                                                                                       |

|                                                                        |                                  |                             |                          |             |        |         |     |                      |              |                                                                                                              |
|------------------------------------------------------------------------|----------------------------------|-----------------------------|--------------------------|-------------|--------|---------|-----|----------------------|--------------|--------------------------------------------------------------------------------------------------------------|
| (change from minute 3 to minute 4)                                     |                                  | paired <i>t</i> -test       | Experimental             | 21.000      | 3.118  | 0.005   | **  |                      | S3b          |                                                                                                              |
| Optogenetic modulation of freezing - learned fear - Leak controls only | Percent freezing                 | RM-ANOVA                    | Light On/Off (RM)        | 1, 28       | 12.574 | 0.001   | **  | n = 8 ctrl, 22 expt  | in main text | Excluded due to technical reasons: 9305, 9796, 9795, 9562, 9522, 9524; Excluded 9811 = freezing < 10%        |
|                                                                        |                                  |                             | Light x Group            | 1, 28       | 17.135 | 0.000   | *** |                      |              |                                                                                                              |
|                                                                        |                                  |                             | Group                    | 1, 28       | 8.513  | 0.007   | **  |                      |              |                                                                                                              |
|                                                                        | Change in freezing               | <i>t</i> -test: ctrl vs exp | Light off minus light on | 28.000      | -4.139 | 0.000   | *** |                      |              |                                                                                                              |
| Optogenetic modulation of freezing - innate fear - leak controls only  | Percent freezing                 | RM-ANOVA                    | Light On/Off (RM)        | 2, 56       | 0.808  | 0.451   |     | n = 8 ctrl, 22 exp   | in main text | sphericity met; Excluded due to technical reasons: 9796, 9562, 9522, 9524, 9525                              |
|                                                                        |                                  |                             | Light x group            | 2, 56       | 1.201  | 0.309   |     |                      |              |                                                                                                              |
|                                                                        |                                  |                             | Group                    | 1, 28       | 5.329  | 0.029   |     |                      |              |                                                                                                              |
| Response to light application (change from minute 3 to minute 4)       | Percent freezing                 | paired <i>t</i> -test       | Leak controls            | 7.000       | -0.162 | 0.876   |     | n = 8 ctrl, 22 exp   | S3d          |                                                                                                              |
|                                                                        |                                  |                             | Experimental             | 21.000      | 3.118  | 0.005   | **  |                      |              |                                                                                                              |
| RTPP locomotion                                                        | % distance when light on         | <i>t</i> -test              | Ctrl vs Exp              | 48.000      | -0.499 | 0.620   |     | n = 29 ctrl, 21 exp  | 3f           | Excluded due to technical reasons: 9796, 9562, 9561, 9522, 9524                                              |
| RTPP side preference                                                   | % time on light-ON side          | <i>t</i> -test              | Ctrl vs Exp              | 48.000      | -0.409 | 0.684   |     |                      | 3g           |                                                                                                              |
| RTPP locomotion                                                        | distance when light on           | <i>t</i> -test              | Ctrl vs Exp              | 48.000      | 0.520  | 0.605   |     | n = 29 ctrl, 21 exp  | 3h           | Excluded due to technical reasons: 9796, 9562, 9561, 9522, 9524                                              |
|                                                                        | distance when light off          | <i>t</i> -test              | Ctrl vs Exp              | 48.000      | -1.104 | 0.275   |     |                      | 3i           |                                                                                                              |
| Optogenetic modulation of freezing - learned fear by minute            | Percent freezing during light-ON | RM-ANOVA                    | Time (RM)                | 2, 92       | 26.689 | < 0.001 | **  | n = 26 ctrl, 22 expt | S3a          | time X light did not meet sphericity - Greenhouse-Geisser reported for time x light and time x light x group |
|                                                                        |                                  |                             | Time x Group             | 2, 92       | 1.788  | 0.173   |     |                      |              |                                                                                                              |
|                                                                        |                                  |                             | Light (RM)               | 1, 46       | 50.602 | < 0.001 | **  |                      |              |                                                                                                              |
|                                                                        |                                  |                             | Light X Group            | 1, 46       | 4.743  | 0.035   | *   |                      |              |                                                                                                              |
|                                                                        |                                  |                             | Time x Light             | 1.72, 79.12 | 10.43  | < 0.001 | **  |                      |              |                                                                                                              |
|                                                                        |                                  |                             | Time X Light X Group     | 1.72, 79.12 | 0.392  | 0.646   |     |                      |              |                                                                                                              |
|                                                                        |                                  |                             | Group                    | 1, 46       | 0.411  | 0.524   |     |                      |              |                                                                                                              |
| Optogenetic modulation of freezing -innate fear by minute              | Percent freezing during light-ON | RM-ANOVA on first 6 minutes | Time (RM)                | 2, 96       | 9.99   | <0.001  | **  | n = 28 ctrl, 22 exp  | S3b          | sphericity met                                                                                               |
|                                                                        |                                  |                             | Time x Group             | 2, 96       | 1.049  | 0.354   |     |                      |              |                                                                                                              |
|                                                                        |                                  |                             | Light (RM)               | 1, 48       | 8.862  | 0.005   | **  |                      |              |                                                                                                              |
|                                                                        |                                  |                             | Light X Group            | 1, 48       | 0.096  | 0.757   |     |                      |              |                                                                                                              |
|                                                                        |                                  |                             | Time x Light             | 2, 96       | 5.673  | 0.005   | **  |                      |              |                                                                                                              |
|                                                                        |                                  |                             | Time X Light X Group     | 2, 96       | 6.443  | 0.002   | **  |                      |              |                                                                                                              |
|                                                                        |                                  |                             | Group                    | 1, 48       | 2.391  | 0.129   |     |                      |              |                                                                                                              |
|                                                                        |                                  |                             | Time (RM)                | 2, 56       | 12.507 | 0.000   | *** |                      |              | time X light did not                                                                                         |
|                                                                        |                                  |                             | Time x Group             | 2, 56       | 2.944  | 0.061   | *   |                      |              |                                                                                                              |
|                                                                        |                                  |                             | Light (RM)               | 1, 28       | 12.574 | 0.001   | *** |                      |              |                                                                                                              |

|                                                                                  |                                  |                             |                      |                |        |       |     |                      |     |                                                                                                                                                        |
|----------------------------------------------------------------------------------|----------------------------------|-----------------------------|----------------------|----------------|--------|-------|-----|----------------------|-----|--------------------------------------------------------------------------------------------------------------------------------------------------------|
| Optogenetic modulation of freezing - learned fear by minute - Leak controls only | Percent freezing during light-ON | RM-ANOVA                    | Light X Group        | 1, 28          | 17.135 | 0.000 | **  | n = 8 ctrl, 22 exp   | S3c | meet sphericity - Greenhouse-Geisser reported for time x light and time x light x group                                                                |
|                                                                                  |                                  |                             | Time x Light         | 1.617, 45.279  | 1.153  | 0.315 |     |                      |     |                                                                                                                                                        |
|                                                                                  |                                  |                             | Time X Light X Group | 1.617, 45.279  | 3.919  | 0.035 | *   |                      |     |                                                                                                                                                        |
|                                                                                  |                                  |                             | Group                | 1, 28          | 8.513  | 0.007 | **  |                      |     |                                                                                                                                                        |
| Optogenetic modulation of freezing -innate fear by minute Leak controls only     | Percent freezing during light-ON | RM-ANOVA on first 6 minutes | Time (RM)            | 1.631, 45.659  | 5.407  | 0.012 | *   | n = 8 ctrl, 22 exp   | S3d | sphericity not met for time, Greenhouse-Geisser reported for time, time X grp, time X light and Time X grp X light                                     |
|                                                                                  |                                  |                             | Time x Group         | 1.631, 45.659  | 0.666  | 0.489 |     |                      |     |                                                                                                                                                        |
|                                                                                  |                                  |                             | Light (RM)           | 1, 58          | 0.23   | 0.635 |     |                      |     |                                                                                                                                                        |
|                                                                                  |                                  |                             | Light X Group        | 1, 58          | 2.327  | 0.138 |     |                      |     |                                                                                                                                                        |
|                                                                                  |                                  |                             | Time x Light         | 1.838, 51.466  | 4.322  | 0.021 | *   |                      |     |                                                                                                                                                        |
|                                                                                  |                                  |                             | Time X Light X Group | 1.838, 51.466  | 0.518  | 0.599 |     |                      |     |                                                                                                                                                        |
| RTPP locomotion - by 5 minute bin                                                | % distance when light on         | RM-ANOVA                    | Time                 | 2.2, 105.7     | 0.175  | 0.859 |     | n = 29 ctrl, 21 exp  | S3e | sphericity not met - values reported are Greenhouse-Geisser                                                                                            |
|                                                                                  |                                  |                             | Time x Group         | 2.2, 105.7     | 0.529  | 0.663 |     |                      |     |                                                                                                                                                        |
|                                                                                  |                                  |                             | Group                | 1, 48          | 0.167  | 0.684 |     |                      |     |                                                                                                                                                        |
| RTPP side preference - by 5 minute bin                                           | % time on light-ON side          | RM-ANOVA                    | Time                 | 1.99, 95.59    | 0.098  | 0.906 |     | n = 29 ctrl, 21 exp  | S3f | sphericity not met - values reported are Greenhouse-Geisser                                                                                            |
|                                                                                  |                                  |                             | Time x Group         | 1.99, 95.59    | 0.393  | 0.675 |     |                      |     |                                                                                                                                                        |
|                                                                                  |                                  |                             | Group                | 1, 48          | 0.249  | 0.620 |     |                      |     |                                                                                                                                                        |
| RTPP locomotion - by 5 minute bin                                                | distance (cm/s) when light on    | RM-ANOVA                    | Time                 | 2.439, 112.213 | 2.167  | 0.108 |     | n = 27 ctrl, 21 expt | S3g | sphericity not met - values reported are Greenhouse-Geisser; 9313, 9790 excluded for failure to enter light-on side during at least one time bin       |
|                                                                                  |                                  |                             | Time x Group         | 2.439, 112.213 | 1.553  | 0.212 |     |                      |     |                                                                                                                                                        |
|                                                                                  |                                  |                             | Group                | 1, 46          | 0.006  | 0.941 |     |                      |     |                                                                                                                                                        |
| RTPP locomotion - by 5 minute bin                                                | distance (cm/s) when light off   | RM-ANOVA                    | Time                 | 2.013, 63.69   | 13.653 | 0.000 | *** | n = 27 ctrl, 21 expt | S3h | sphericity not met for time - values reported are Greenhouse-Geisser; 9316, 9811 excluded due to no entry into light-off side in at least one time bin |
|                                                                                  |                                  |                             | Time x Group         | 2.013, 63.69   | 1.137  | 0.326 |     |                      |     |                                                                                                                                                        |
|                                                                                  |                                  |                             | Group                | 1, 46          | 0.428  | 0.516 |     |                      |     |                                                                                                                                                        |

\*\*Technical reasons for exclusions include lost ferrule, lost video, laser malfunction
